# Supplementary material
Source: HighWire-hosted journal article supplement (doi:10.1101/rna.032912.112)
Supplement: SuppFigLegends.docx [file SuppFigLegends.docx]

**Figure S1:** **Digitoxin alters many different types of alternative splicing events.** (A) OmniViewer analysis reveals that digitoxin changes many different types of alternative splicing events. Treatment conditions were 100nM for 24 hours in HEK293 cell line. Shown here are relative percent of total induced changes for each subtype, as annotated by OmniViewer analysis. (B) Validation of 26 cassette exons identified to be splicing changes by MADS+ method. Error bars are standard error of the mean change in exon inclusion percentage for three independent experiments.

**Figure S2: AU motif binding proteins and other SR proteins remain unchanged after digitoxin treatment.** (A) hnRNPD and D-like splicing factors can bind AU-rich motifs and showed altered splicing of their own transcripts after digitoxin. Immunoblot analysis reveals no changes in protein level for these two proteins after digitoxin. (B) TIA1 and SAM68 are both known to bind AU-rich elements, but are unchanged at the protein level after digitoxin treatment. (C) Total protein levels of SRp30c, SRp40, SRp55 and SRp75 are unchanged by digitoxin, when probed with specific antibodies by immunoblot.

**Figure S3: SRp20 and Tra2-beta are unaffected at the transcriptional level, as measured by quantitative real-time PCR.**

**Figure S4: shSRp20 and shTra2-beta HJAY Validation reveals wide range of induced splicing changes.** (A) Validation of induced splicing changes by knockdown of SRp20 for 15 exons identified by microarray analysis. Error bars represent standard error of mean exon inclusion percentage for three independent knockdown experiments. (B) The same analysis for array-identified Tra2-beta targets.

**Figure S5: For overlapping exons, loss of SRp20 or Tra2-beta causes similar changes in alternative splicing as digitoxin treatment.** (A) For 5 exons that are both digitoxin and SRp20 regulated, the induced splicing changes for the treatments were similar in direction and magnitude. Error bars represent standard error of induced splicing change for three independent experiments. (B) The same analysis for 5 overlapping digitoxin and Tra2-beta.
